# Supplementary material for: Tuning the interpenetration of metal–organic frameworks through changing ligand functionality: effect on gas adsorption properties
Source: Royal Society of Chemistry journal article supplement (doi:10.1039/c9ce01309a), 2019-11-29
Supplement: c9ce01309a1.pdf [file c9ce01309a1.pdf]

# Electronic Supplementary Information

## Tuning the interpenetration of metal–organic frameworks through changing ligand functionality: Effect on gas adsorption properties

Bin Li<sup>a</sup>, Qing-Qing Yan<sup>a</sup>, Zhi-Qiang Xu<sup>b</sup>, Ying-Bo Xu<sup>b\*</sup> and Guo-Ping Yong<sup>a\*</sup>

<sup>a</sup> Department of Chemistry, University of Science and Technology of China, Hefei 230026, P. R. China. E-mail: [gpyong@ustc.edu.cn](mailto:gpyong@ustc.edu.cn)

<sup>b</sup> The USTC-Anhui Tobacco Joint Laboratory of Chemistry and Combustion, Hefei 230066, P. R. China. E-mail: [838654606@qq.com](mailto:838654606@qq.com)

**Table S1** Selected bond distances (Å) and angles (°) for USTC-2–USTC-4.<sup>a</sup>

| USTC-2                |            | USTC-3                |          | USTC-4              |            |
|-----------------------|------------|-----------------------|----------|---------------------|------------|
| Co(1)-O(1)#15         | 1.991(4)   | Zn(1)-O(1)            | 1.972(5) | Co(1)-O(1)          | 2.035(3)   |
| Co(1)-O(1)#16         | 1.991(4)   | Zn(1)-O(1)#14         | 1.972(5) | Co(1)-O(5)          | 1.975(2)   |
| Co(1)-N(1)            | 2.051(4)   | Zn(1)-N(1)#11         | 2.058(6) | Co(1)-O(7)#2        | 2.050(3)   |
| Co(1)-N(1)#14         | 2.051(4)   | Zn(1)-N(1)#12         | 2.058(6) | Co(1)-O(8)#2        | 2.349(2)   |
| O(1)#15-Co(1)-O(1)#16 | 99.9(2)    | O(1)-Zn(1)-O(1)#14    | 105.2(3) | Co(1)-N(4)#4        | 2.084(3)   |
| O(1)#15-Co(1)-N(1)    | 116.22(17) | O(1)-Zn(1)-N(1)#11    | 116.0(2) | Co(2)-O(1)          | 2.082(2)   |
| O(1)#15-Co(1)-N(1)#14 | 108.34(17) | O(1)-Zn(1)-N(1)#12    | 106.9(2) | Co(2)-O(3)#4        | 2.096(3)   |
| O(1)#16-Co(1)-N(1)    | 108.34(17) | O(1)#14-Zn(1)-N(1)#11 | 106.9(2) | Co(2)-O(4)#4        | 2.157(3)   |
| O(1)#16-Co(1)-N(1)#14 | 116.22(17) | O(1)#14-Zn(1)-N(1)#12 | 116.0(2) | Co(1)-O(8)#2        | 2.191(2)   |
| N(1)-Co(1)-N(1)#14    | 107.993    | N(1)#11-Zn(1)-N(1)#12 | 106.3(3) | Co(2)-O(9)          | 2.084(3)   |
|                       |            |                       |          | Co(2)-N(2)#2        | 2.081(3)   |
|                       |            |                       |          | O(1)-Co(1)-O(5)     | 115.33(11) |
|                       |            |                       |          | O(1)-Co(1)-O(7)#2   | 111.16(10) |
|                       |            |                       |          | O(1)-Co(1)-O(8)#2   | 77.18(9)   |
|                       |            |                       |          | O(1)-Co(1)-N(4)#4   | 109.63(12) |
|                       |            |                       |          | O(5)-Co(1)-O(7)#2   | 106.03(10) |
|                       |            |                       |          | O(5)-Co(1)-O(8)#2   | 164.03(10) |
|                       |            |                       |          | O(5)-Co(1)-N(4)#4   | 97.03(12)  |
|                       |            |                       |          | O(7)#2-Co(1)-O(8)#2 | 58.71(8)   |
|                       |            |                       |          | O(7)#2-Co(1)-N(4)#4 | 117.11(12) |
|                       |            |                       |          | O(8)#2-Co(1)-N(4)#4 | 87.23(10)  |
|                       |            |                       |          | O(1)-Co(2)-O(3)#4   | 93.77(10)  |
|                       |            |                       |          | O(1)-Co(2)-O(4)#4   | 153.29(10) |
|                       |            |                       |          | O(1)-Co(2)-O(8)#2   | 79.94(10)  |
|                       |            |                       |          | O(1)-Co(2)-O(9)     | 102.47(11) |
|                       |            |                       |          | O(1)-Co(2)-N(2)#2   | 101.49(11) |
|                       |            |                       |          | O(3)#4-Co(2)-O(4)#4 | 61.62(10)  |
|                       |            |                       |          | O(3)#4-Co(2)-O(8)#2 | 88.31(10)  |

|                     |            |
|---------------------|------------|
| O(3)#4-Co(2)-O(9)   | 92.00(11)  |
| O(3)#4-Co(2)-N(2)#2 | 163.82(12) |
| O(4)#4-Co(2)-O(8)#2 | 88.58(10)  |
| O(4)#4-Co(2)-O(9)   | 89.42(11)  |
| O(4)#4-Co(2)-N(2)#2 | 102.36(11) |
| O(8)#2-Co(2)-O(9)   | 177.54(11) |
| O(8)#2-Co(2)-N(2)#2 | 89.10(10)  |
| O(9)-Co(2)-N(2)#2   | 89.93(12)  |

<sup>a</sup> Symmetry code for **USTC-2**: #14=-x+1/2, -y+1/2, z, #15=x+3/4, -y+3/4, z+1/4, #16=-x+3/4, y+3/4, z+1/4; symmetry code for **USTC-3**: #11=x+3/4, -y+1/4, z+3/4, #12=-x+3/4, y+1/4, z+3/4, #14=-x+1/2, -y+1/2, z; symmetry code for **USTC-4**: #2=-x, y+1/2, -z+1/2, #4=x, -y-1/2, z-1/2.

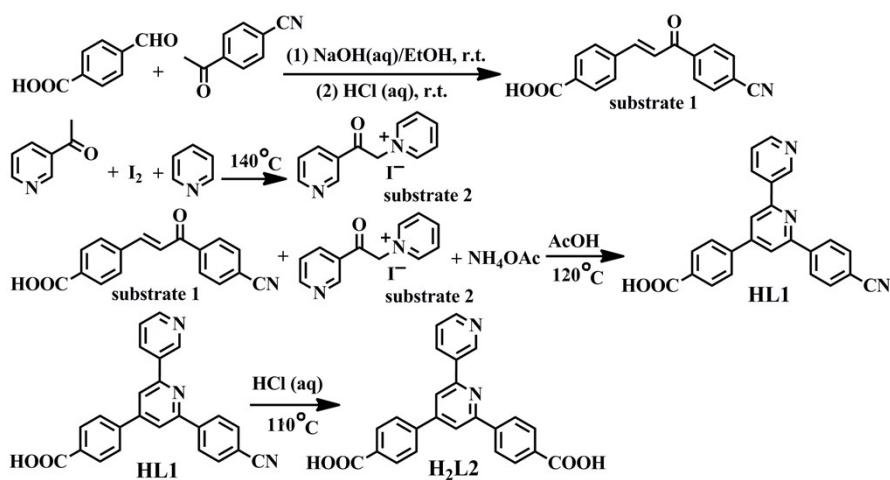

**Scheme S1** The synthesis procedure for HL1 and H<sub>2</sub>L2 ligands.

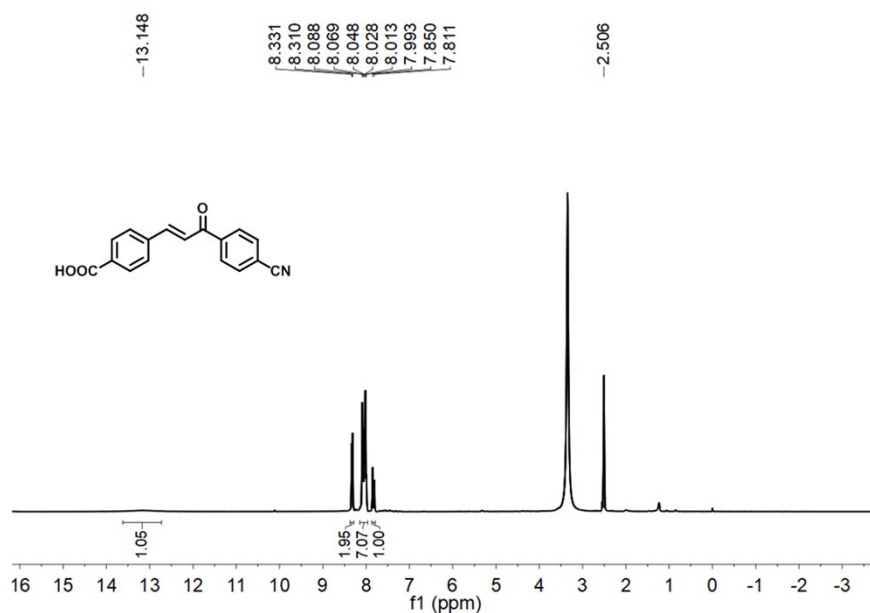

**Fig. S1** <sup>1</sup>H NMR (400 MHz, dms-*d*<sub>6</sub>) of substrate 1.

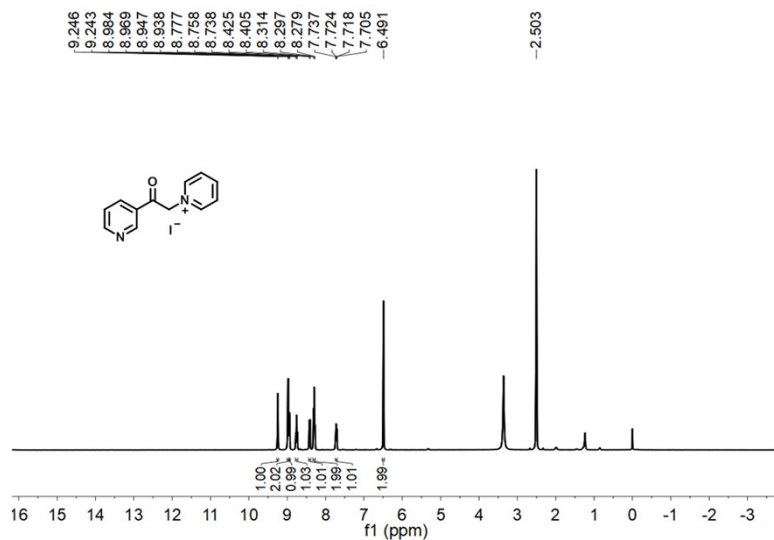

**Fig. S2**  $^1\text{H}$  NMR (400 MHz,  $\text{dms}\text{-}d_6$ ) of substrate 2.

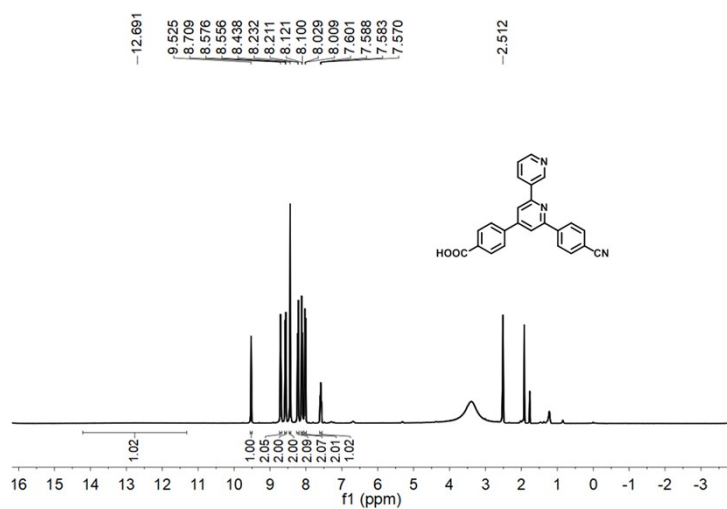

**Fig. S3**  $^1\text{H}$  NMR (400 MHz,  $\text{dms}\text{-}d_6$ ) of HL1.

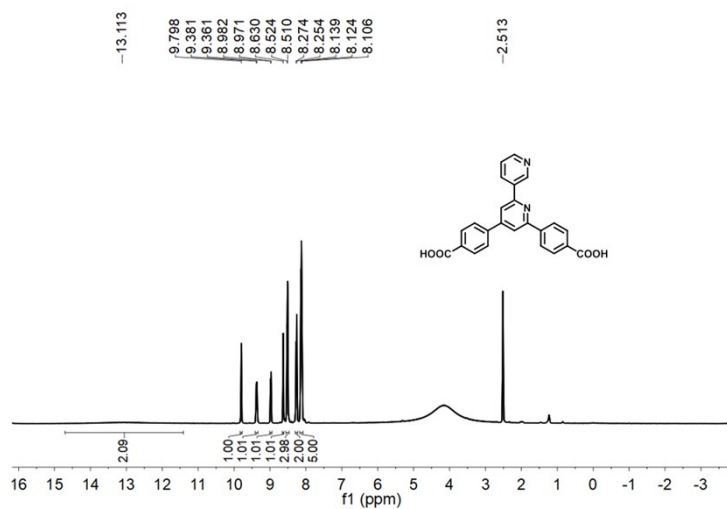

**Fig. S4**  $^1\text{H}$  NMR (400 MHz,  $\text{dms}\text{-}d_6$ ) of  $\text{H}_2\text{L}_2$ .

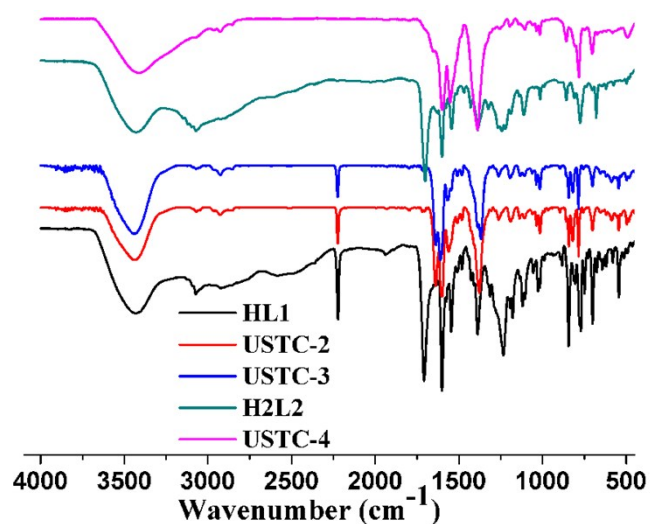

**Fig. S5** IR absorption of HL1 and H<sub>2</sub>L2 ligand, and USTC-2–USTC-4.

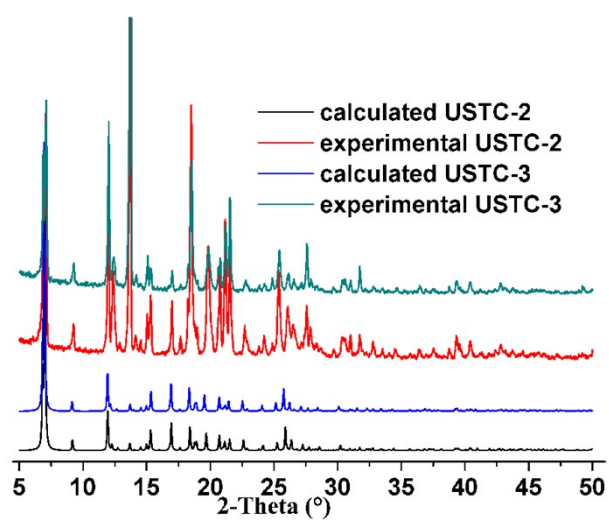

**Fig. S6** Powder XRD profiles of USTC-2 and USTC-3.

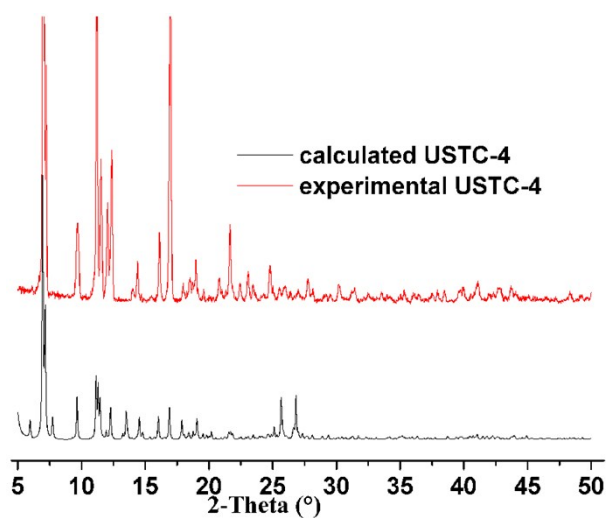

**Fig. S7** Powder XRD profiles of USTC-4.

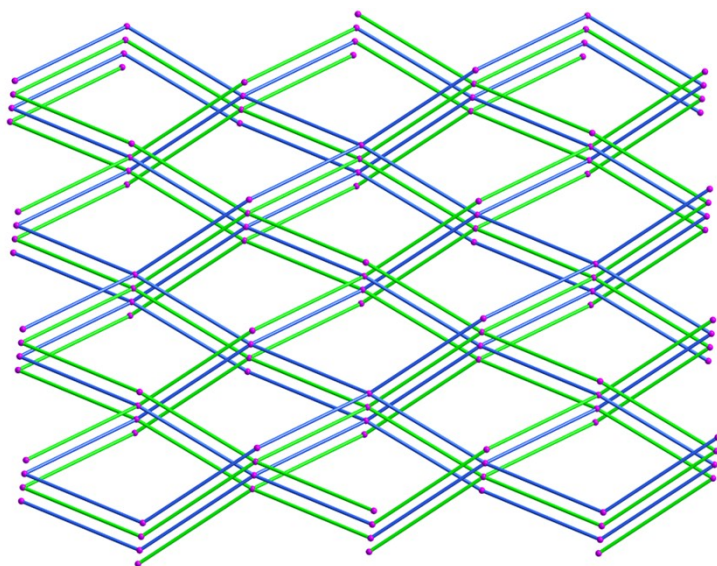

**Fig. S8** The two-fold interpenetrated 3D framework of USTC-2.

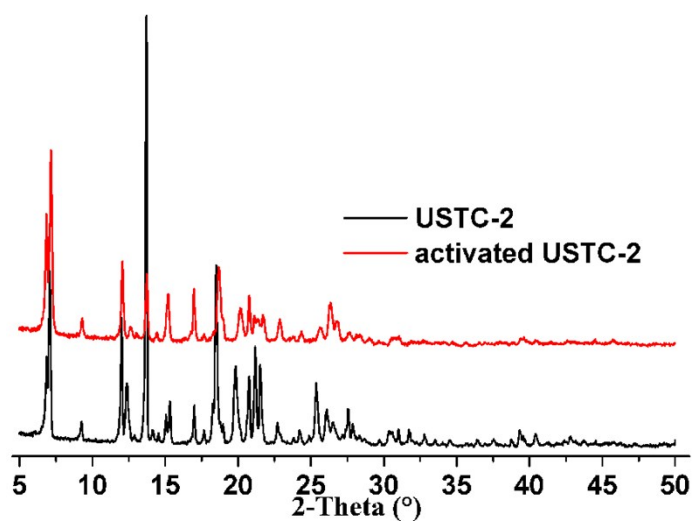

**Fig. S9** Powder XRD profiles of USTC-2 and activated USTC-2.

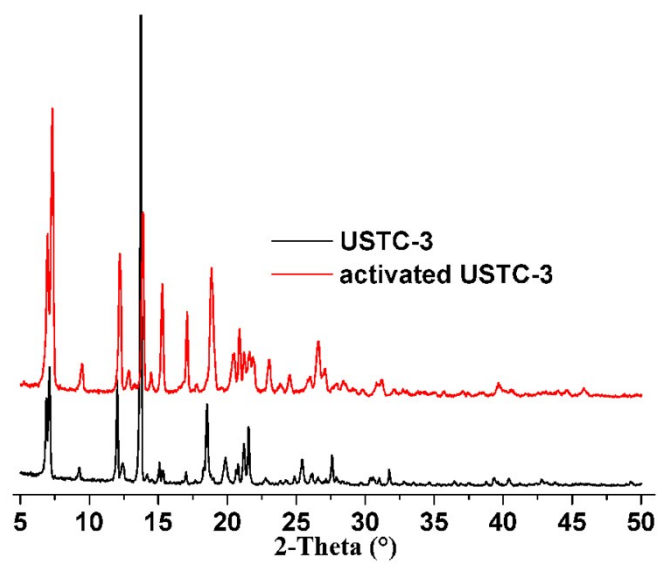

**Fig. S10** Powder XRD profiles of USTC-3 and activated USTC-3.

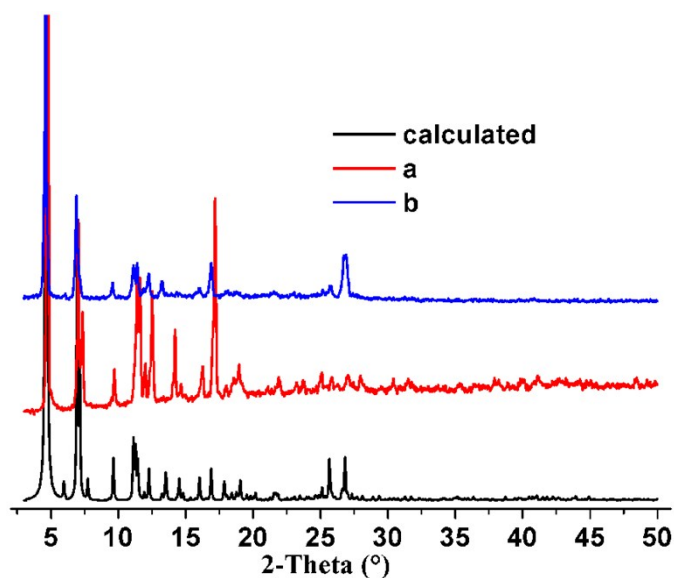

**Fig. S11** Powder XRD profiles of USTC-4 (calculated), and activated USTC-4 before (a) and after (b) N<sub>2</sub> adsorption experiment.

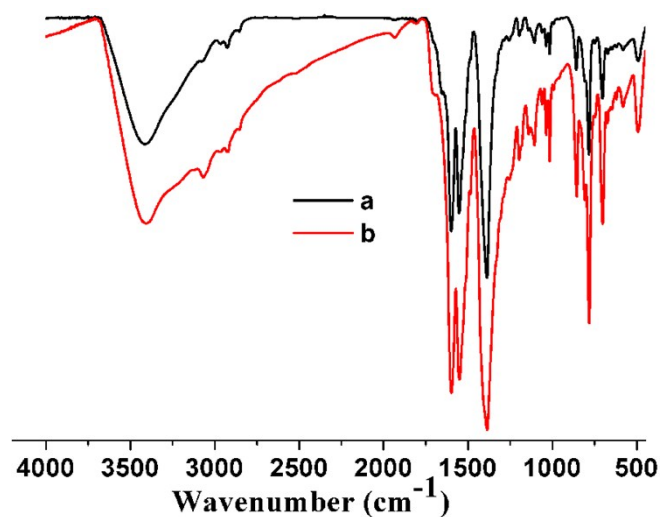

**Fig. S12** IR absorption of activated USTC-4 before (a) and after (b) N<sub>2</sub> adsorption experiment.

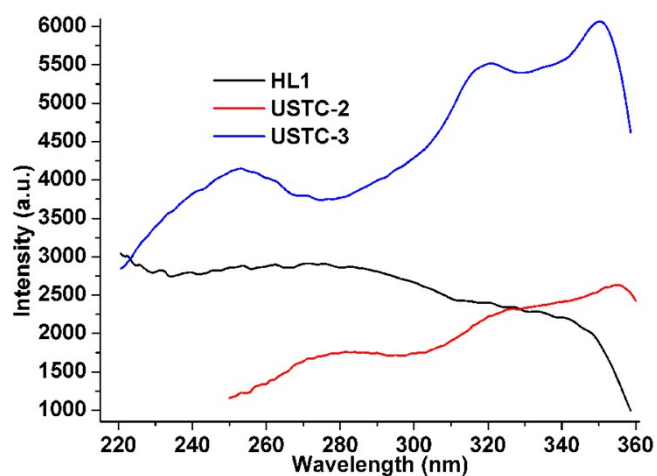

**Fig. S13** Solid-state excitation spectra of HL1 ligand, USTC-2 and USTC-3.

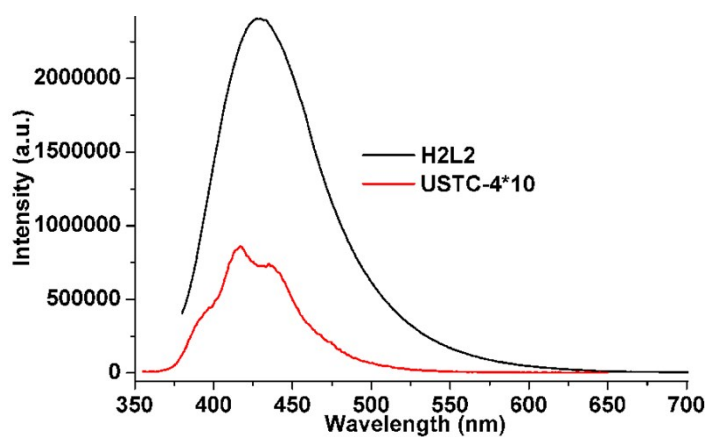

**Fig. S14** Solid-state PL spectra of H<sub>2</sub>L2 ligand and USTC-4.

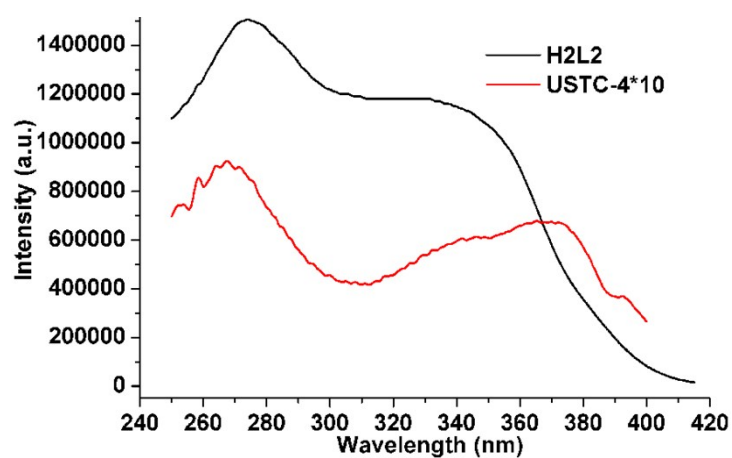

**Fig. S15** Solid-state excitation spectra of H<sub>2</sub>L2 ligand and USTC-4.
